# Supplementary material for: Pyrazole and Triazole Derivatives as Mycobacterium tuberculosis UDP-Galactopyranose Inhibitors
Source: MDPI journal article supplement (doi:10.3390/ph15020197), 2022-02-04

*Supplementary material*

# **Pyrazole and Triazole derivatives as Mycobacterium tuberculosis UDP-galactopyranose inhibitors**

**Dalia M. Ahmed<sup>1,2</sup>, Jeffrey M. Chen<sup>3,4,5</sup>, David A. R. Sanders<sup>1\*</sup>**

<sup>1</sup> Department of Chemistry, University of Saskatchewan, 110 Science Place, Saskatoon, Saskatchewan, Canada S7N 5C9, [dalia.ahmed@usask.ca](mailto:dalia.ahmed@usask.ca)

<sup>2</sup> Pharmaceutical Chemistry Department, Faculty of Pharmacy, Ain Shams University, Egypt

<sup>3</sup> Vaccine and Infectious Disease Organization, Saskatoon, Saskatchewan S7N 5E3, Canada, [jeffrey.chen@usask.ca](mailto:jeffrey.chen@usask.ca)

<sup>4</sup> Department of Veterinary Microbiology, Western College of Veterinary Medicine, University of Saskatchewan, Saskatoon, Saskatchewan S7N 5B4, Canada.

<sup>5</sup> Vaccinology and Immunotherapeutics Program, School of Public Health, University of Saskatchewan, Saskatoon, Saskatchewan S7N 2Z4, Canada.

\* Correspondence: [david.sanders@usask.ca](mailto:david.sanders@usask.ca)

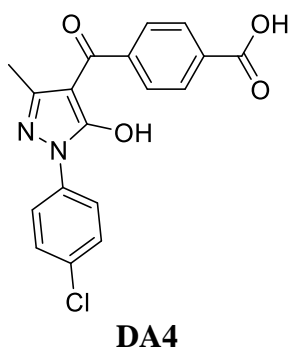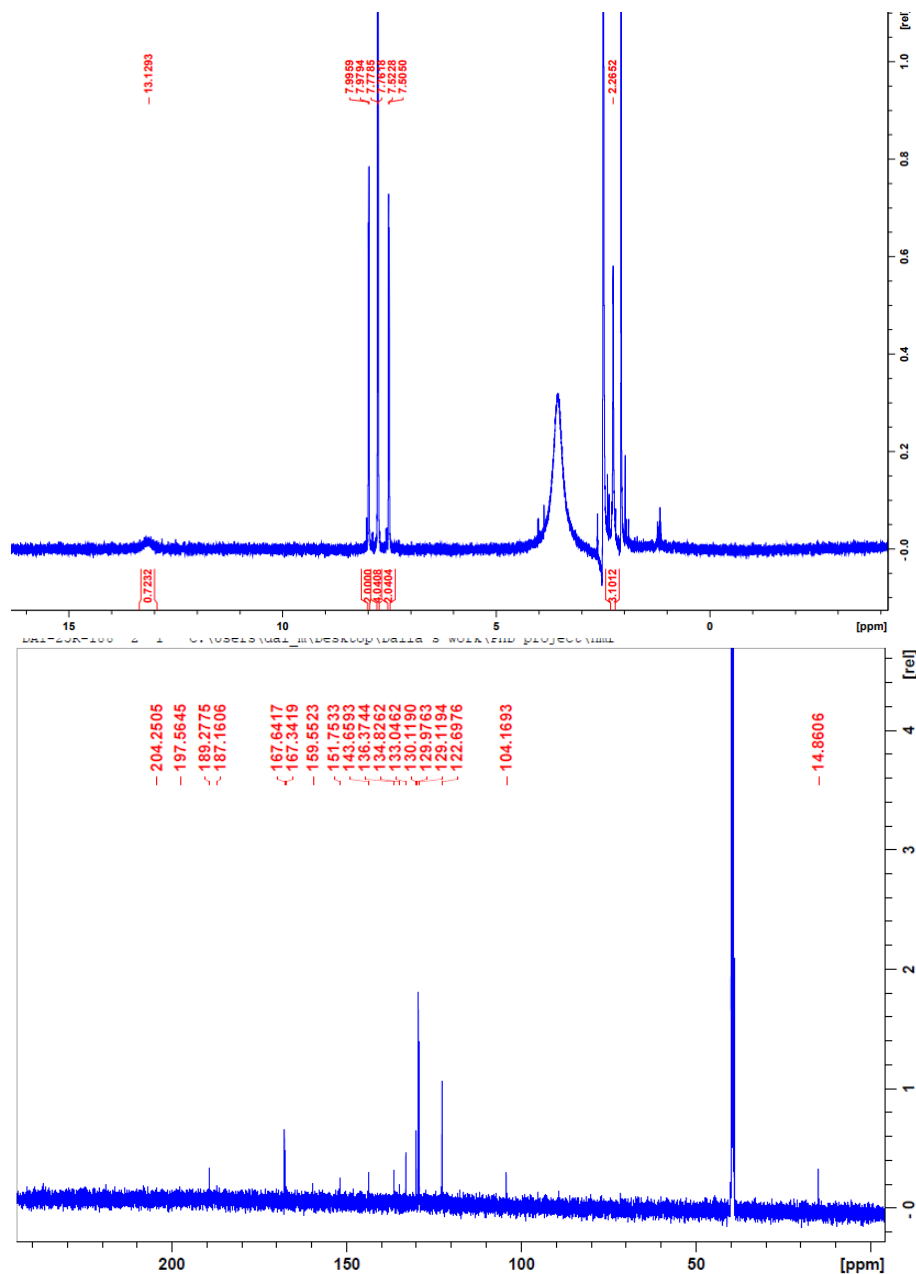

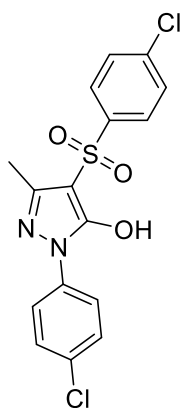

**DA5**

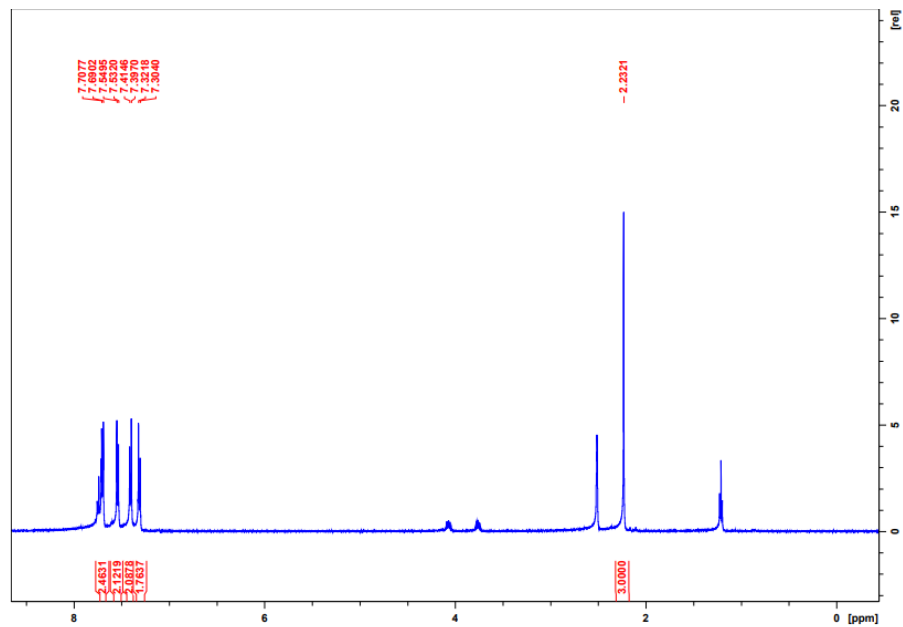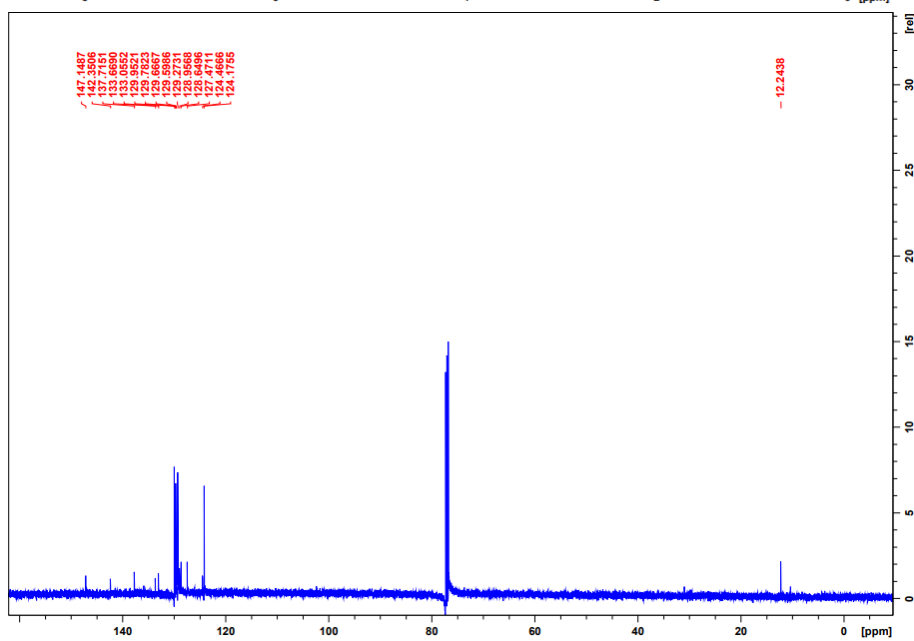

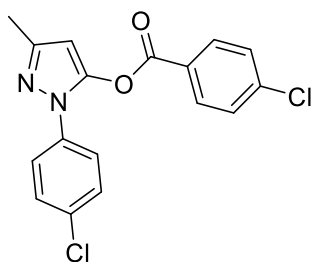

DA6

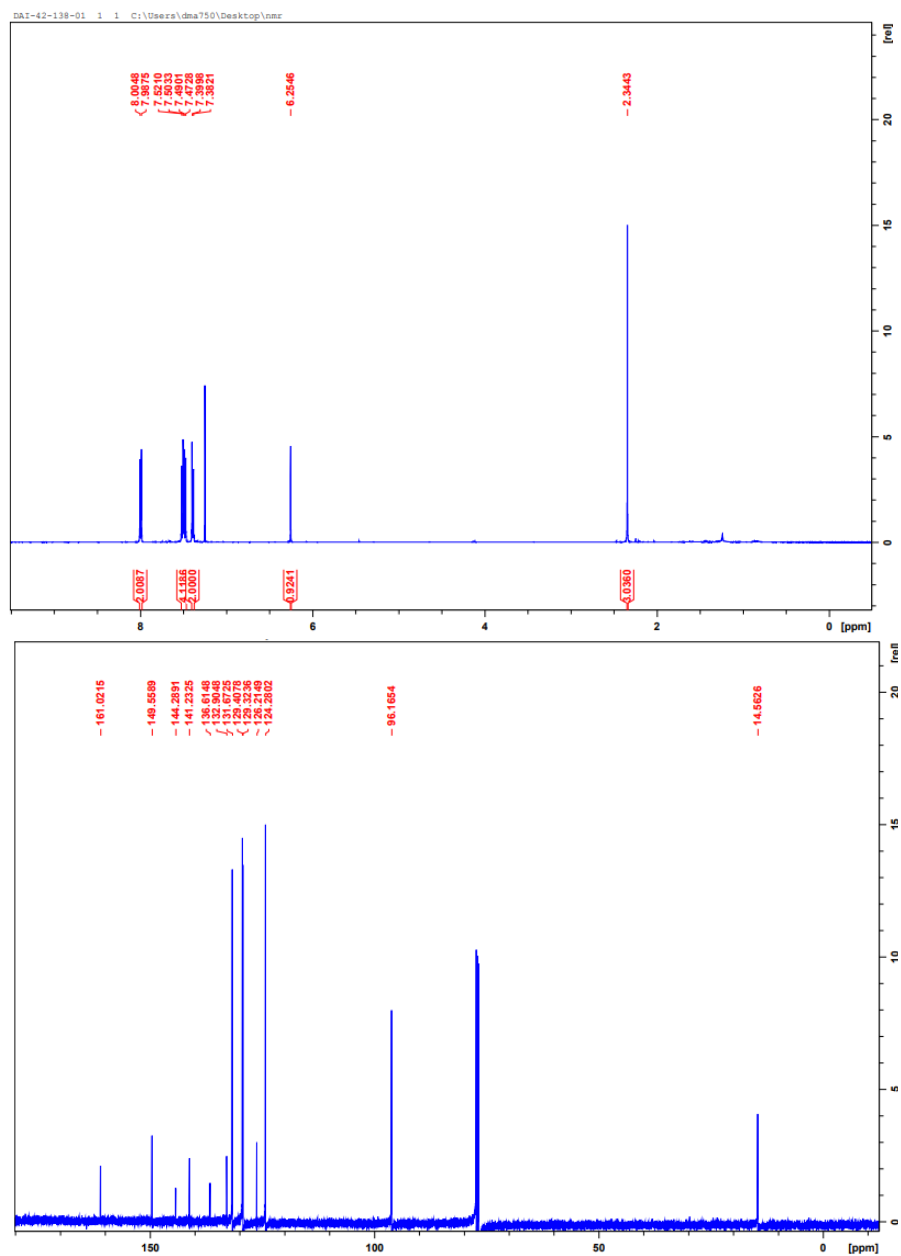

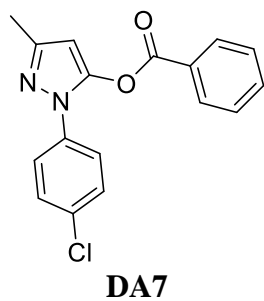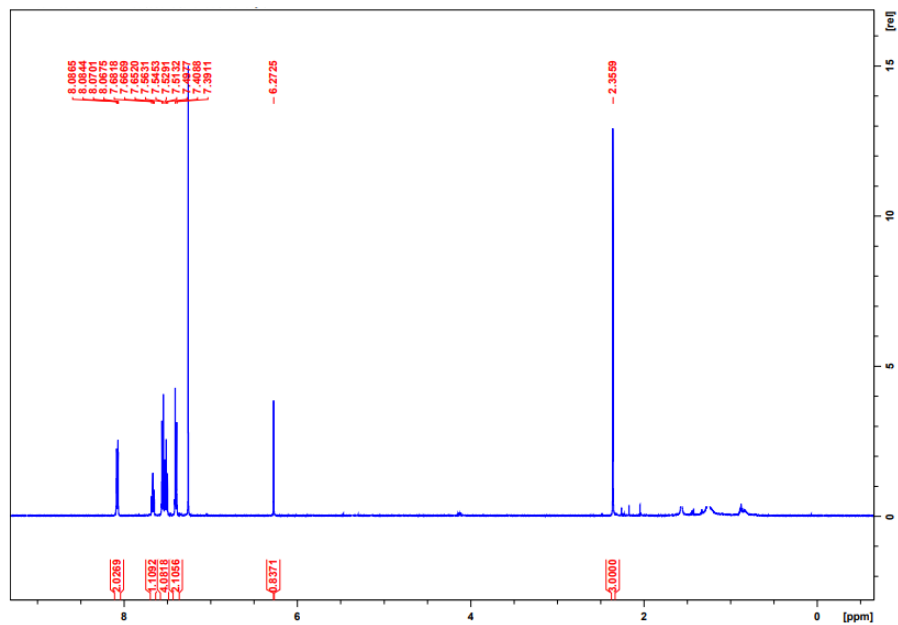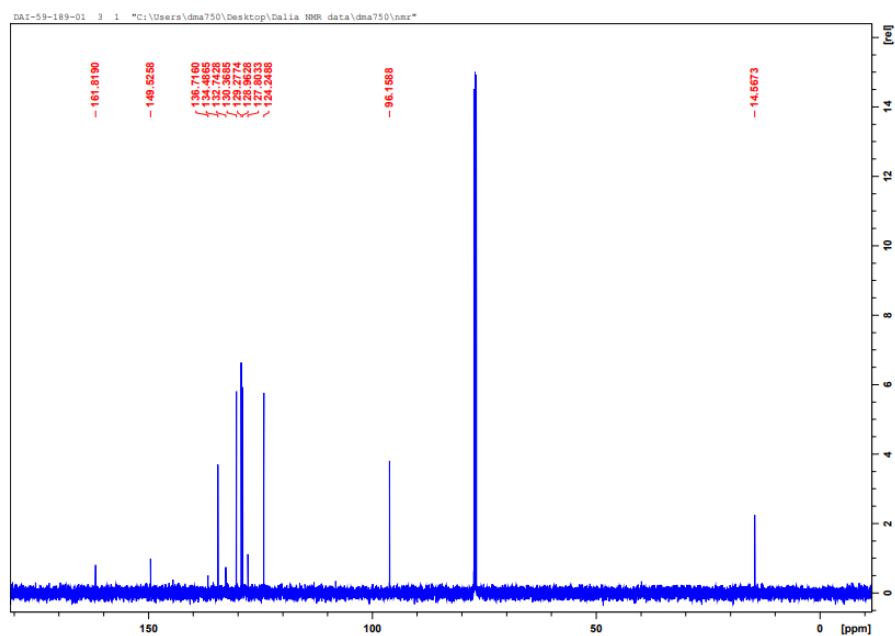

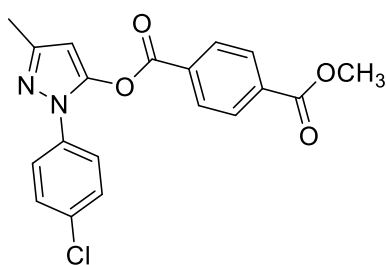

**DA8**

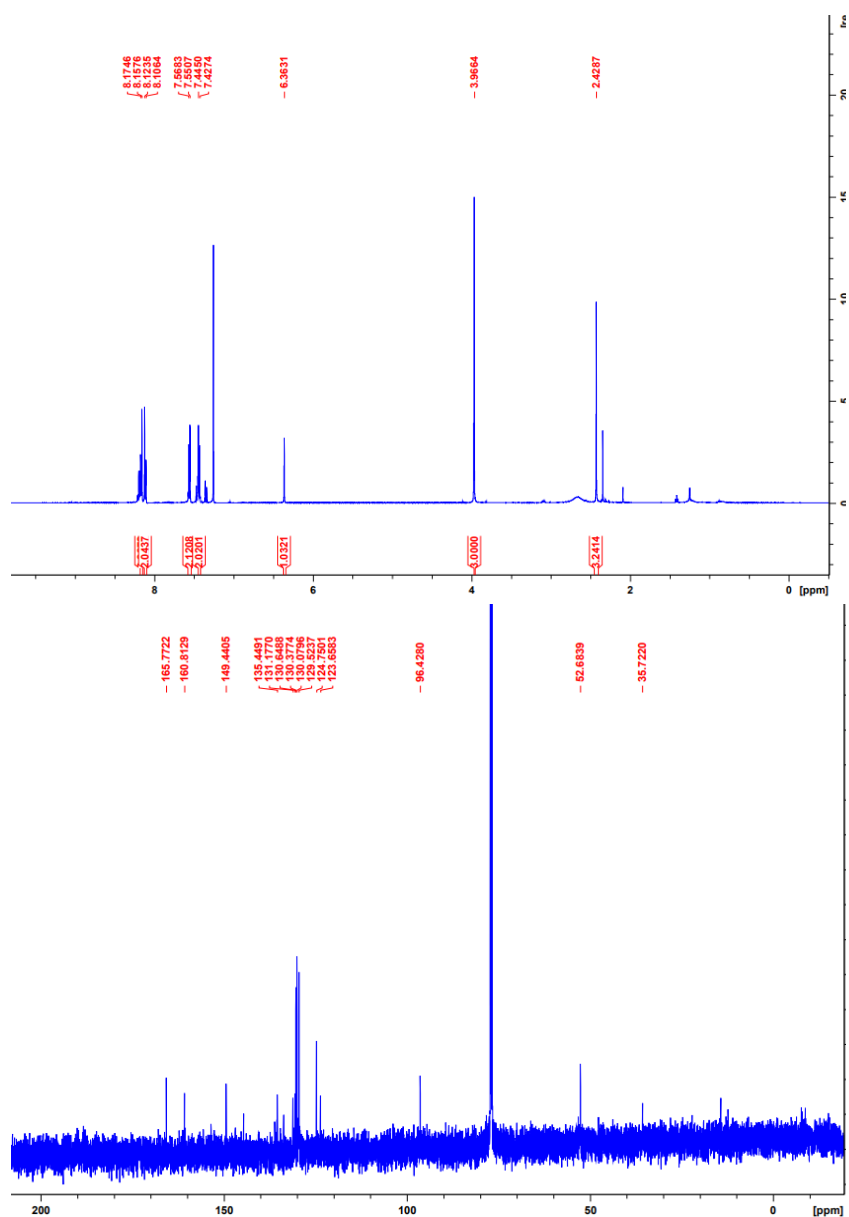

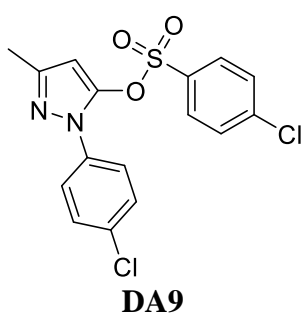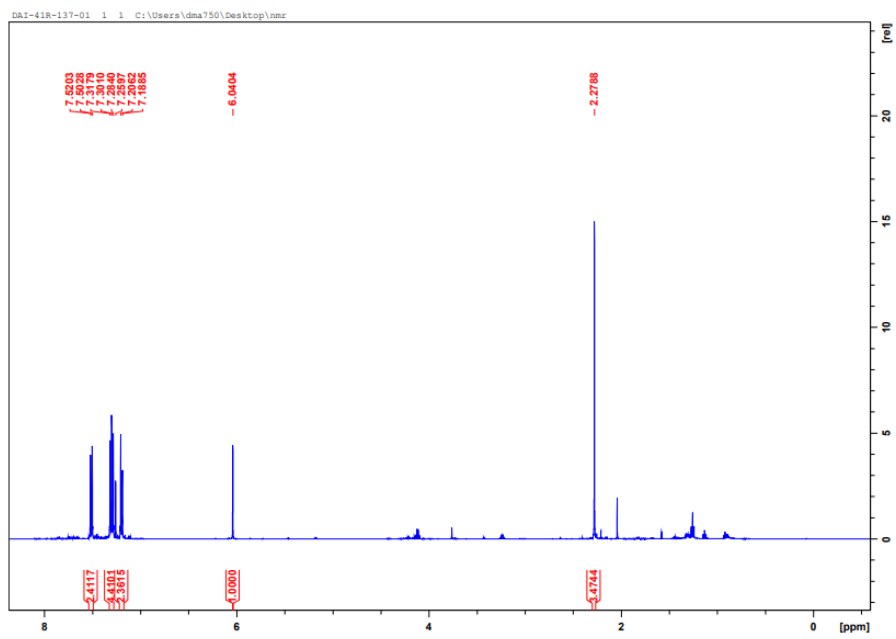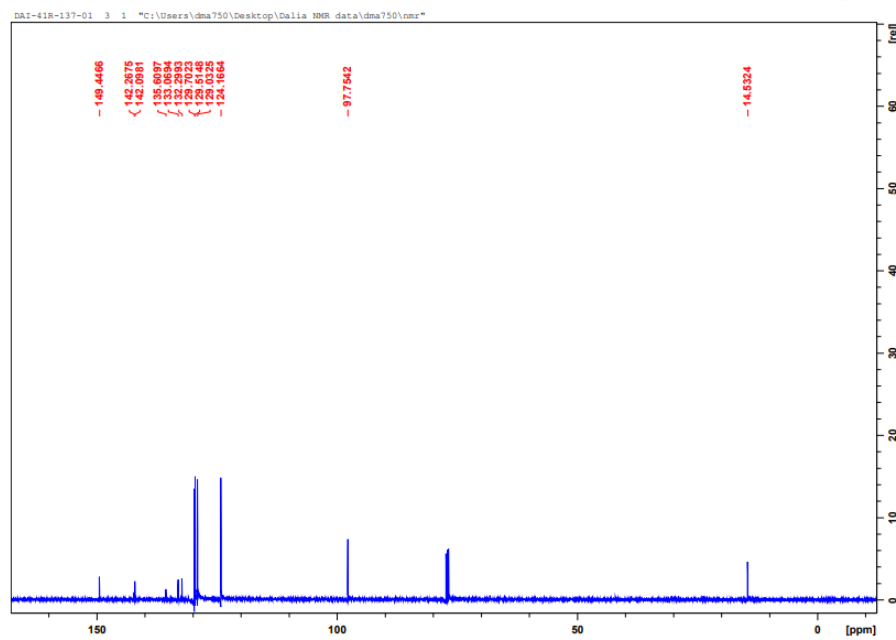

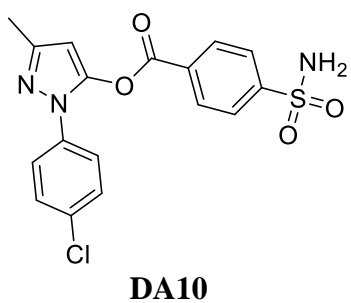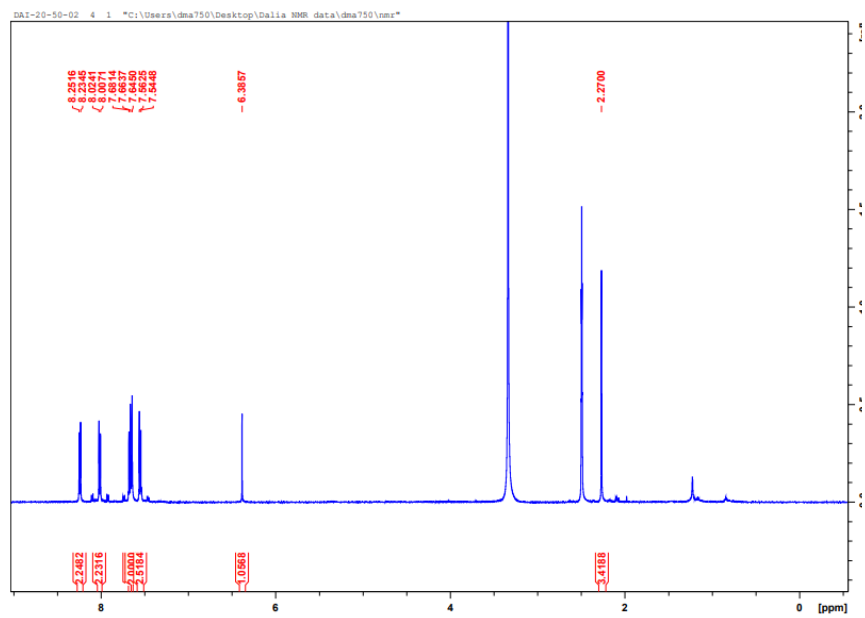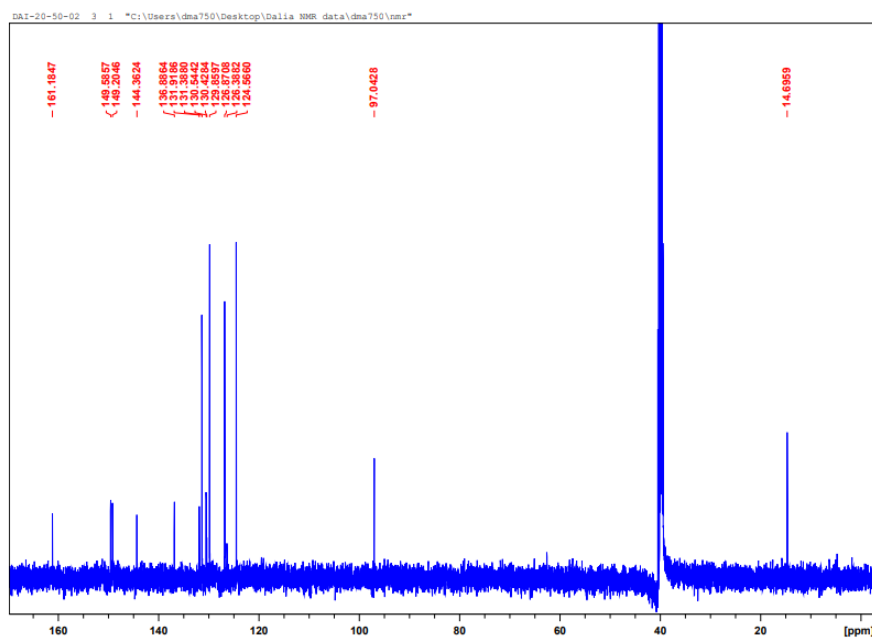



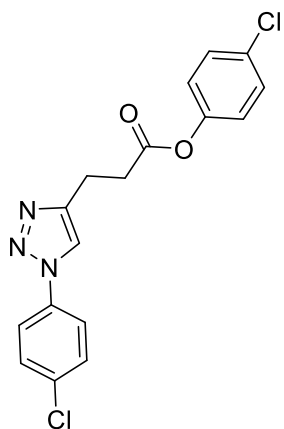

**DA11**

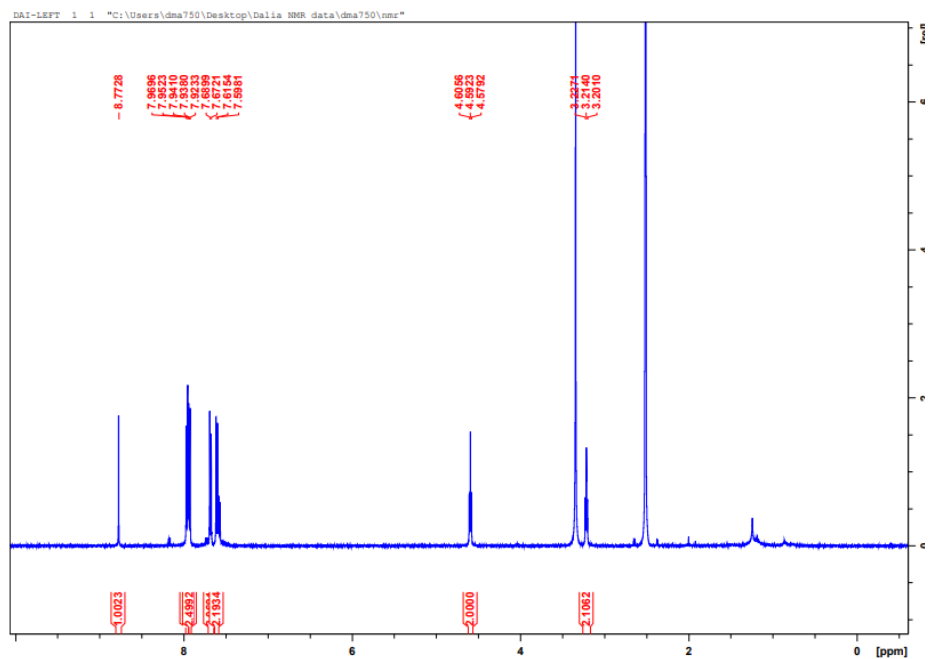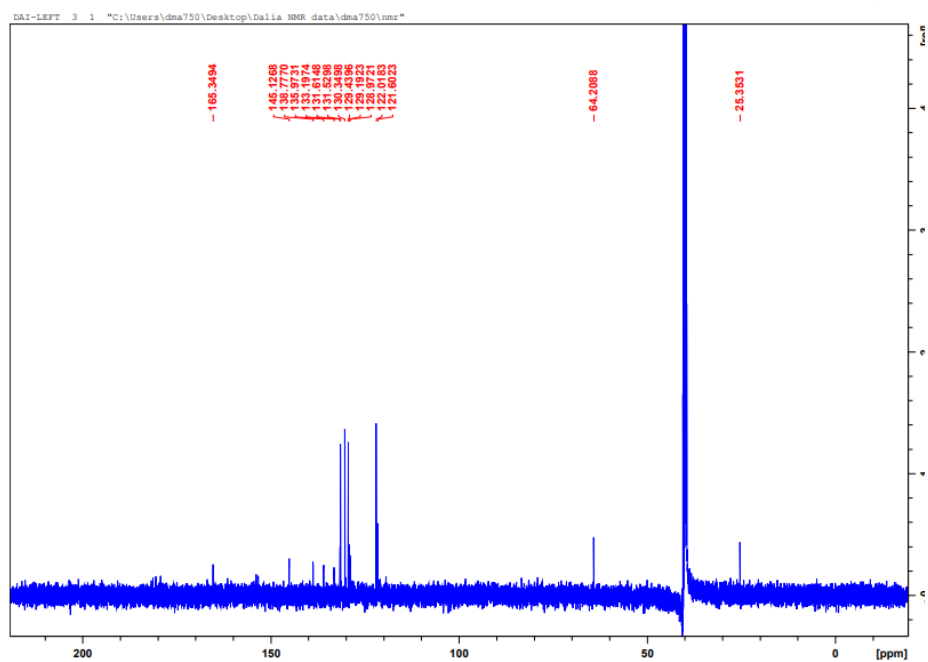

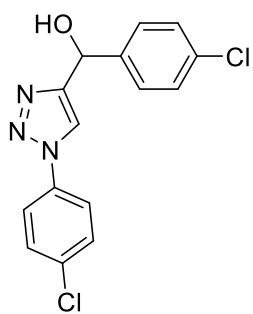

**DA12**

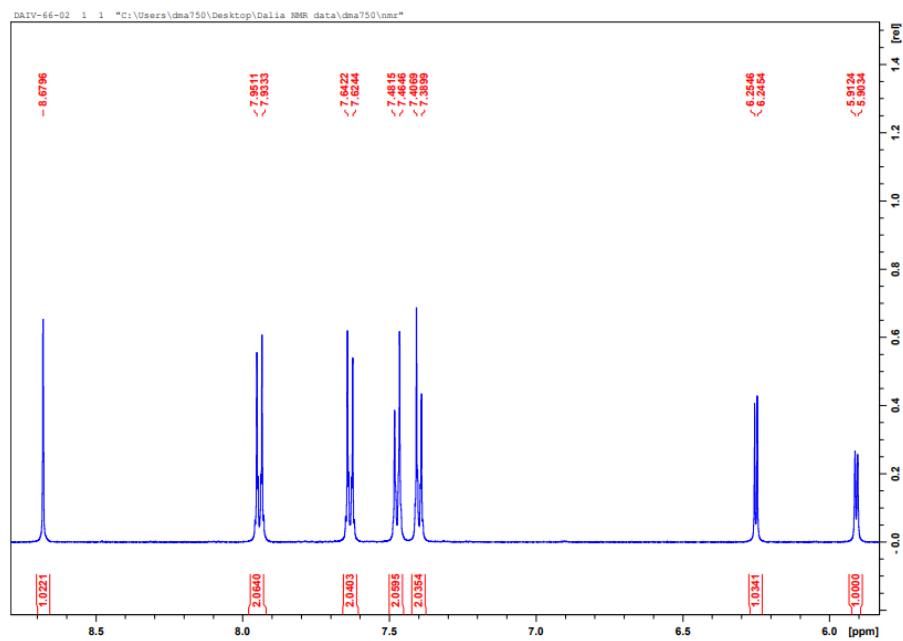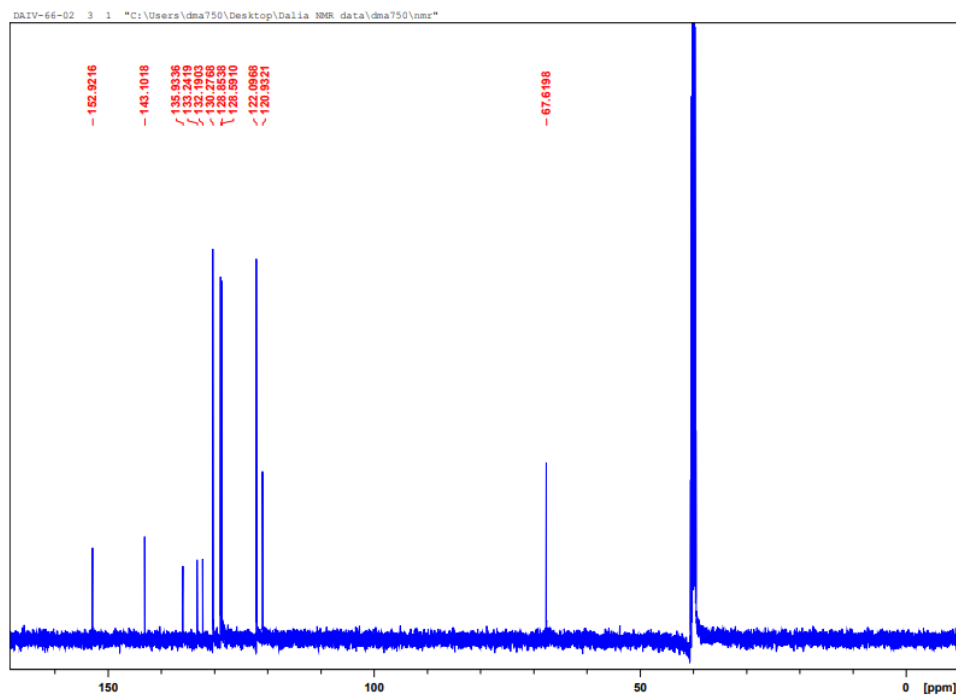

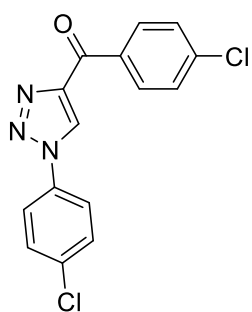

**DA13**

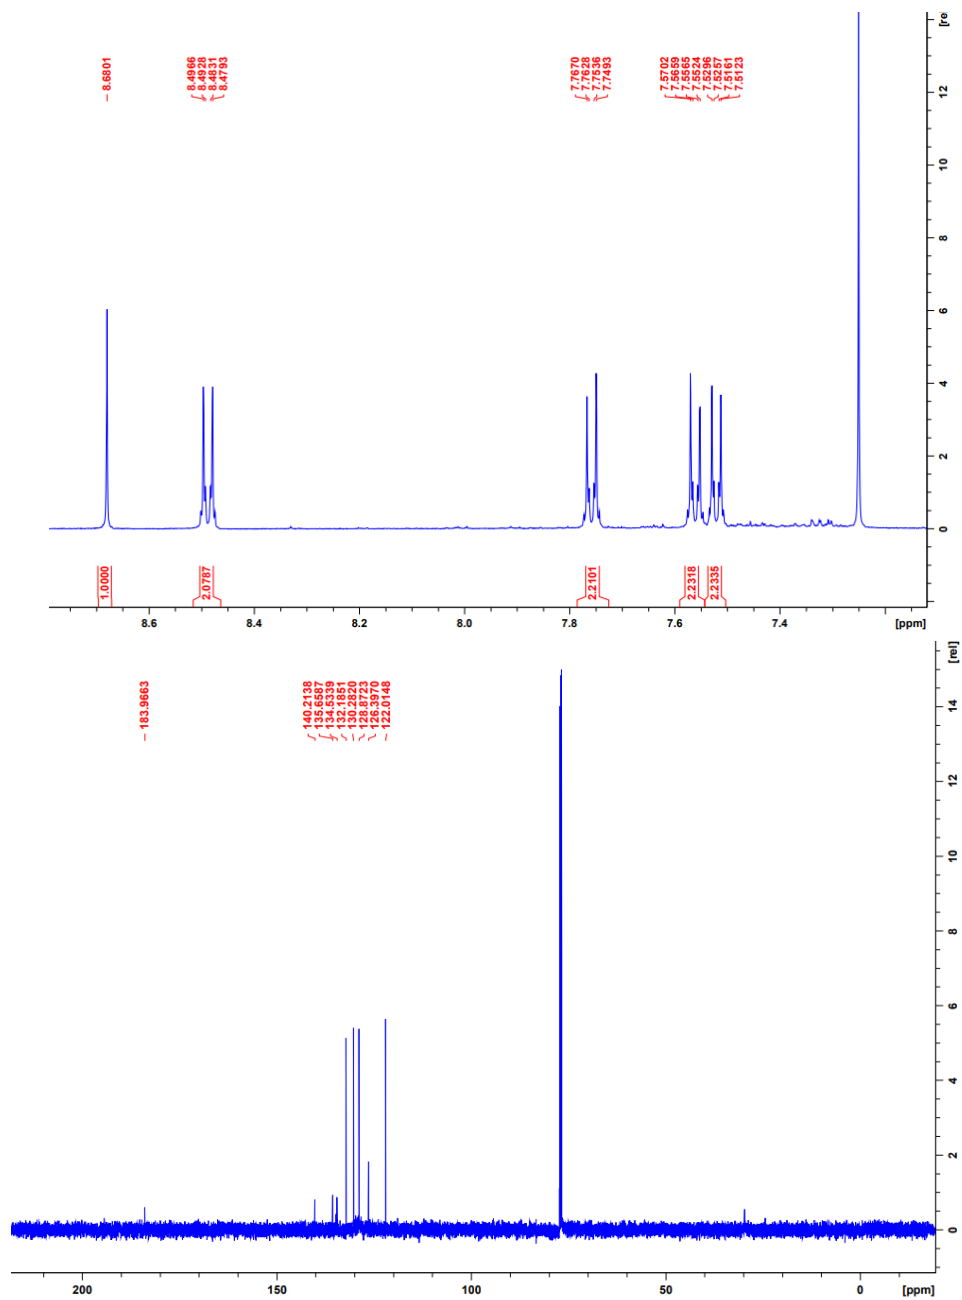

Supplement: s1 [file s1]
